# Supplementary material
Source: MDPI journal article supplement (https://www.mdpi.com/2071-1050/15/18/13941)
Supplement: s1 [file s1 › sustainability-2562190-supplementary.pdf]

## Supplementary Information

# Streamflow Response to Climate and Land-Use Changes in a Tropical Island Basin

Can Cao<sup>1, 2, 3</sup>, Rui Sun<sup>1, 4\*</sup>, Zhixiang Wu<sup>1, 4</sup>, Bangqian Chen<sup>1, 4</sup>, Chuan Yang<sup>1, 4</sup>, Qian Li<sup>2\*</sup>, Klaus Fraedrich<sup>5</sup>

<sup>1</sup> Rubber Research Institute, Chinese Academy of Tropical Agricultural Sciences, Haikou 571101, China

<sup>2</sup> School of Geography and Planning, Ningxia University, Yinchuan 750021, China

<sup>3</sup> Key Laboratory of Water Cycle and Related Land Surface Processes, Institute of Geographic Sciences and Natural Resources Research, Chinese Academy of Sciences, Beijing 100101, China

<sup>4</sup> Hainan Danzhou Tropical Agro-ecosystem National Observation and Research Station, Danzhou 571737, China

<sup>5</sup> Max Planck Institute for Meteorology, Hamburg 20146, Germany

### This File contains:

Tables S1–S5 and their captions

**Table S1.** Parameter information and fitted values.

| No. | Parameter <sup>a</sup> | Description                                                                            | Fitted Values | Range      |
|-----|------------------------|----------------------------------------------------------------------------------------|---------------|------------|
| 1   | r__EPCO.hru            | Plant uptake compensation factor                                                       | -0.86         | [-1, 1]    |
| 2   | r__SLSUBBSN.hru        | Average slope length                                                                   | 8.85          | [0, 15]    |
| 3   | v__CH_K2.rte           | Effective hydraulic conductivity in main channel                                       | 11.75         | [5, 20]    |
| 4   | r__SOL_BD.sol          | Soil moist bulk density                                                                | 1.63          | [0.9, 2.5] |
| 5   | v__GW_DELAY.gw         | Groundwater delay (days)                                                               | 5.37          | [1, 20]    |
| 6   | v__GW_REVAP.gw         | Groundwater "revap" coefficient                                                        | -0.82         | [-1, 1]    |
| 7   | v__ALPHA_BF.gw         | Baseflow alpha factor (days)                                                           | 0.23          | [0, 1]     |
| 8   | r__SOL_Z.sol           | Depth from soil surface to bottom of layer                                             | 0.54          | [0, 1]     |
| 9   | v__GWQMN.gw            | Threshold depth of water in the shallow aquifer required for return flow to occur (mm) | 1.94          | [0, 2]     |
| 10  | v__ALPHA_BNK.rte       | Baseflow alpha factor for bank storage                                                 | 0.69          | [0, 1]     |
| 11  | r__SOL_AWC.sol         | Available water capacity of the soil layer                                             | 0.78          | [0, 1]     |
| 12  | r__SOL_K.sol           | Saturated hydraulic conductivity                                                       | 0.9           | [0, 1]     |
| 13  | v__REVAPMN.gw          | Threshold depth of water in the shallow aquifer for "revap" to occur (mm)              | 3.3           | [0, 10]    |
| 14  | v__ESCO.hru            | Soil evaporation compensation factor                                                   | 0.13          | [0, 1]     |

|    |                |                                                   |       |            |
|----|----------------|---------------------------------------------------|-------|------------|
| 15 | r__CANMX.hru   | Maximum canopy storage                            | 0.74  | [0, 1]     |
| 16 | r__HRU_SLP.hru | Average slope steepness                           | 0.034 | [0, 0.2]   |
| 17 | v__CH_N2.rte   | Manning's "n" value for the main channel          | 0.22  | [-0.01, 1] |
| 18 | r__CN2.mgt     | SCS runoff curve number for moisture condition II | -0.23 | [-1, 10]   |

**a:** Those parameters given to the multiplier (1, 2, 4, 8, 11, 12,15,16,18) are expressed as (r\_ parameter) and their values indicate a multiplicative change to the default values. Other v\_ parameters are directly replaced with the best values.

**Table S2.** Changes in hydrological components due to LUCC in the Nandu River Basin from 1990 to 2015.

| Year      | Unit | ET     | PET    | Surface Runoff | Subsurface Flow | Shallow Percolation | Shallow Water Storage | Deep Recharge | Aquifer Return Flow |
|-----------|------|--------|--------|----------------|-----------------|---------------------|-----------------------|---------------|---------------------|
| 1990      | mm   | 730.90 | 904.80 | 416.06         | 64.24           | 762.40              | 18.08                 | 38.12         | 724.21              |
| 2015      | mm   | 759.80 | 941.20 | 397.73         | 44.83           | 770.92              | 18.78                 | 38.55         | 732.29              |
| Variation | mm   | 28.90  | 36.40  | -18.33         | -19.41          | 8.52                | 0.70                  | 0.43          | 8.08                |
| Rate      | %    | 3.95   | 4.02   | -4.41          | -30.21          | 1.12                | 3.87                  | 1.13          | 1.12                |

**Note:** Values represent the annual average of the study area during the simulation period. The annual average precipitation from 1990 to 2015 was 1975 mm.

**Table S3.** Proportion of hydrological components in Nandu River Basin in the years 1990 and 2015.

| Year | Base Flow<br>/Streamflow | Surface Runoff<br>/Streamflow | Streamflow<br>/Precipitation | Deep Recharge<br>/ Precipitation | ET<br>/Precipitation |
|------|--------------------------|-------------------------------|------------------------------|----------------------------------|----------------------|
| 1990 | 0.65                     | 0.35                          | 0.61                         | 0.02                             | 0.37                 |
| 2015 | 0.66                     | 0.34                          | 0.59                         | 0.02                             | 0.38                 |

**Table S4.** Changes in hydrological components due to Future LUCC in Nandu River Basin.

| Year      | Unit | ET    | PET   | Surface Runoff | Subsurface Flow | Shallow Percolation | Shallow Water Storage | Deep Aquifer Recharge | Return Flow |
|-----------|------|-------|-------|----------------|-----------------|---------------------|-----------------------|-----------------------|-------------|
| 2015      | mm   | 759.8 | 941.2 | 397.73         | 44.83           | 770.92              | 18.78                 | 38.55                 | 732.29      |
| 2040      | mm   | 736.4 | 904.7 | 419.03         | 15.74           | 802.48              | 18.08                 | 40.12                 | 762.27      |
| Variation | mm   | -23.4 | -36.5 | 21.3           | -29.09          | 31.56               | -0.7                  | 1.57                  | 29.98       |
| Rate      | %    | -3.08 | -3.88 | 5.36           | -64.89          | 4.09                | -3.73                 | 4.07                  | 4.09        |

**Note:** values represent the annual average of the study area during the simulation period.

**Table S5.** Proportion of hydrological components in Nandu River Basin in the years 2015 and 2040.

| Year | Base Flow<br>/Streamflow | Surface Runoff<br>/Streamflow | Streamflow<br>/Precipitation | Deep Recharge<br>/ Precipitation | ET<br>/Precipitation |
|------|--------------------------|-------------------------------|------------------------------|----------------------------------|----------------------|
| 2015 | 0.66                     | 0.34                          | 0.59                         | 0.02                             | 0.38                 |
| 2040 | 0.65                     | 0.35                          | 0.61                         | 0.02                             | 0.37                 |
